# Supplementary material for: S2O82−/CeO2 Solid Superacid Catalyst Prepared by Radio-Frequency Plasma-Assisted Hydrothermal Method
Source: MDPI journal article supplement (doi:10.3390/catal13101385), 2023-10-22
Supplement: s1 [file s1]

# $\text{S}_2\text{O}_8^{2-}/\text{CeO}_2$ Solid Superacid Catalyst Prepared by Radio-Frequency Plasma-Assisted Hydrothermal Method

KaiqiangWang <sup>1,†</sup>, Changhui Zhu <sup>1,†</sup>, Xudong Zhang <sup>2</sup>, Baohe Tian <sup>1</sup>, Wenchao Zhu <sup>1,\*</sup> and Bangdou Huang <sup>3,\*</sup>

<sup>1</sup> State Key Laboratory of NBC Protection for Civilian, Beijing 102205, China;

wangkaiqiang2647@163.com (K.W.); zhuchanghui567@163.com (C.Z.); tbh318@sohu.com (B.T.)

<sup>2</sup> School of Mechanical Engineering, Sichuan University of Science and Engineering, Yibin 644000, China;

onlyfaith44@163.com

<sup>3</sup> Beijing International S&T Cooperation Base for Plasma Science and Energy Transformation, Institute of Electrical Engineering, Chinese Academy of Sciences, Beijing 100190, China

\* Correspondence: zhuwenchao\_2007@tsinghua.org.cn (W.Z.); huangbangdou@mail.iee.ac.cn (B.H.)

† These authors contributed equally to this work.

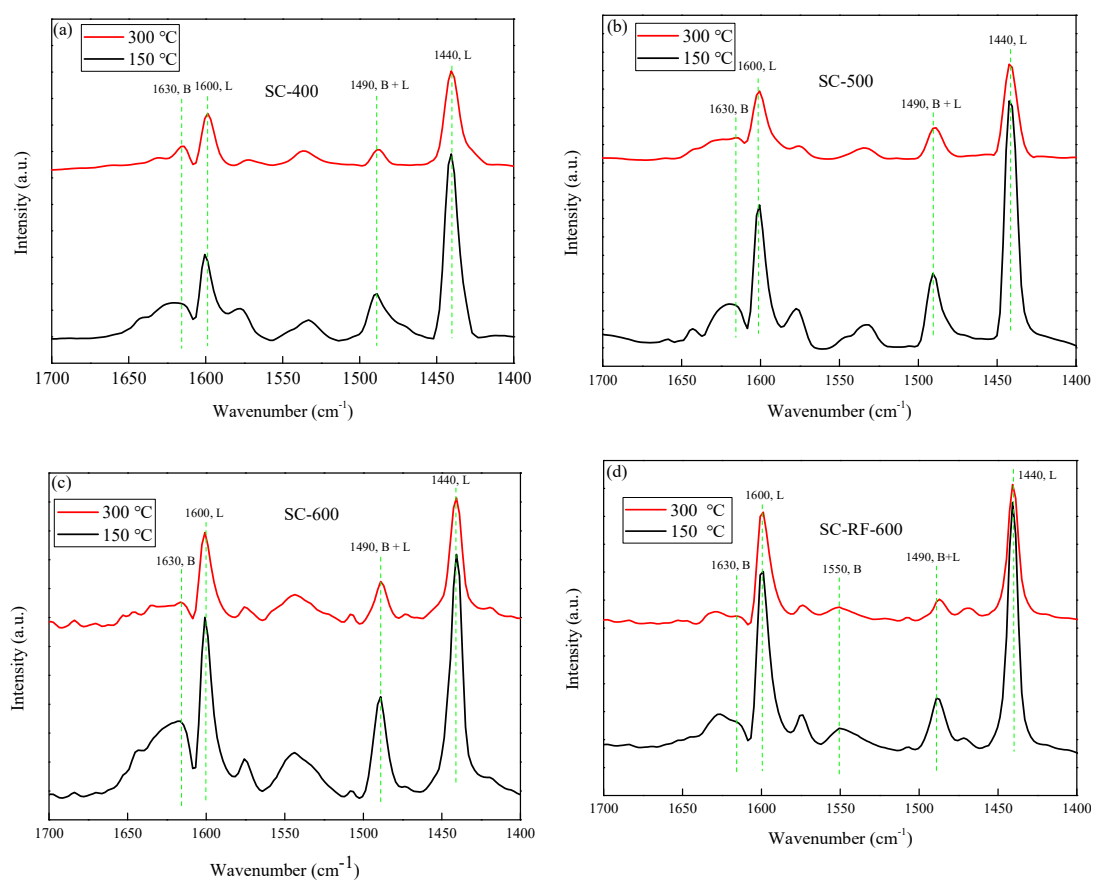

**Figure S1.** Py-IR spectra of the catalysts: (a) SC-400, (b) SC-500, (c) SC-600 and (d) SC-RF-600.

**Table S1.** The summary of acid density over the catalysts.

| Entry | Catalyst      | T<br>(°C) | BA<br>density<br>( $\mu\text{mol} \cdot \text{g}^{-1}$ ) | LA<br>density<br>( $\mu\text{mol} \cdot \text{g}^{-1}$ ) | Total acid<br>density<br>( $\mu\text{mol} \cdot \text{g}^{-1}$ ) | BA density/LA<br>density |
|-------|---------------|-----------|----------------------------------------------------------|----------------------------------------------------------|------------------------------------------------------------------|--------------------------|
| 1     | SC-400        | 150       | 7.33                                                     | 36.56                                                    | 43.89                                                            | 0.20                     |
|       |               | 300       | 3.64                                                     | 14.32                                                    | 17.96                                                            | 0.15                     |
| 2     | SC-500        | 150       | 9.81                                                     | 38.84                                                    | 48.65                                                            | 0.25                     |
|       |               | 300       | 4.38                                                     | 15.21                                                    | 19.58                                                            | 0.29                     |
| 3     | SC-600        | 150       | 14.52                                                    | 30.80                                                    | 45.32                                                            | 0.47                     |
|       |               | 300       | 9.53                                                     | 12.80                                                    | 22.33                                                            | 0.74                     |
| 4     | SC-RF-<br>600 | 150       | 13.83                                                    | 65.66                                                    | 79.49                                                            | 0.21                     |

|  |     |      |       |       |      |
|--|-----|------|-------|-------|------|
|  | 300 | 5.44 | 35.97 | 41.41 | 0.15 |
|--|-----|------|-------|-------|------|

**Table S2.** Comparison of physical properties between the obtained TrpOMe and commercial TrpOMe.

| TrpOMe     | Viscosity(mPa·s) | Density (g·cm <sup>-3</sup> ) | Water content (wt%) |
|------------|------------------|-------------------------------|---------------------|
|            | a                | b                             | c                   |
| Obtained   | 0.367            | 0.767                         | 0.169               |
| Commercial | 0.442            | 0.751                         | 0.207               |

a: determined using an Anton Paar MCR92 rheometer

b: determined using a Micrometrics AccuPyc II 1340 Pycnometer

c: determined by a Mettler Toledo DL31 Karl Fischer titrator

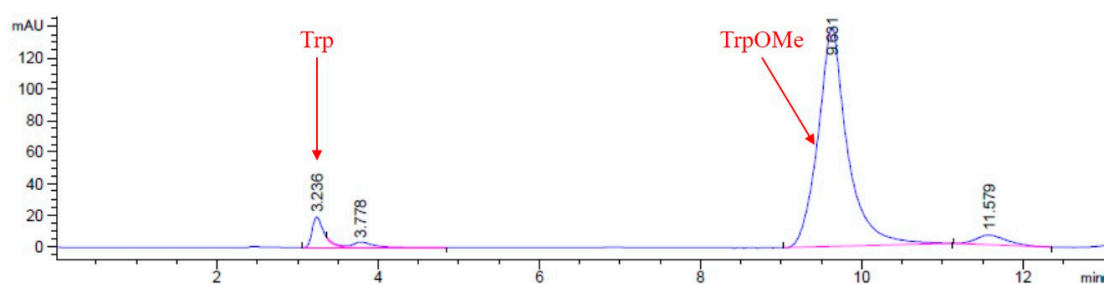

**Figure S2.** HPLC chromatography of the reaction.

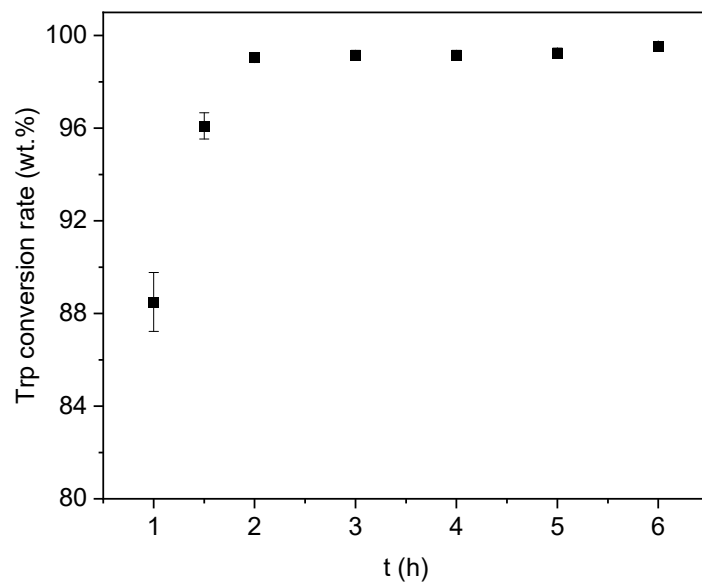

**Figure S3.** Trp conversion rate during the Trp esterification.

Reaction conditions: 50 mg catalyst, 0.0025 mol Trp, 0.5 mol methanol, 150 °C, 1 MPa N<sub>2</sub>, 500 rpm.

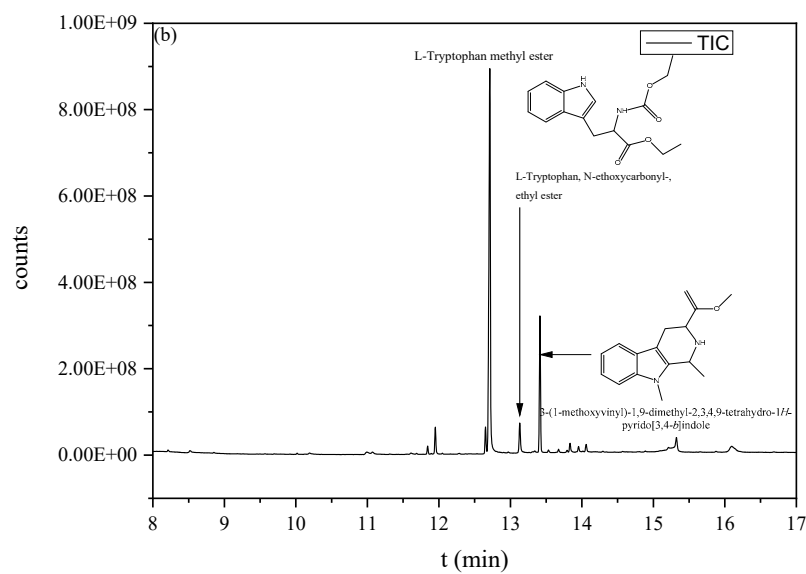

**Figure S4.** GC-MS of the by-products from the esterification reaction of L-Trp, with corresponding by-products structures listed.
